# Supplementary material for: A Psycho-Educational HIV/STI Prevention Intervention for Internally Displaced Women in Leogane, Haiti: Results from a Non-Randomized Cohort Pilot Study
Source: PLoS One. 2014 Feb 28;9(2):e89836. doi: 10.1371/journal.pone.0089836 (PMC3938530; doi:10.1371/journal.pone.0089836)
Supplement: Table S1 — TREND Checklist. The TREND statement checklist, designed to enhance reporting of trials with non-randomized designs, was completed to facilitate transparent reporting of this intervention. (DOC) [file pone.0089836.s002.doc]

**Table S1. TREND Checklist**

|  | Item No | Recommendation |  | Section | |  | |
| --- | --- | --- | --- | --- | --- | --- | --- |
| **Title and abstract** | 1 | Information on how unit were allocated to interventions |  | Abstract | |  | |
| Structured abstract recommended |  | Abstract | |  | |
| Information on target population or study sample |  | Abstract | |  | |
| Introduction | | |  |  |  | |  |
| Background/rationale | 2 | Scientific background and rationale |  | Introduction | |  | |
| Theories used in designing behavioral interventions |  | Introduction | |  | |
| Methods | | |  |  |  | |  |
| Participants | 3 | eligibility criteria |  | Study design | |  | |
| Method of recruitment |  | Study design | |  | |
| Recruitment setting |  | Study design | |  | |
| Settings and locations where the data were collected |  | Procedures | |  | |
| Interventions | 4 | Details of the interventions intended for each study condition and how and when they were actually administered, specifically including: |  | Study design | |  | |
| *Content: what was given?* |  | Procedures | |  | |
| *Delivery method: how was the content given?* |  | Procedures | |  | |
| *Unit of delivery: how were the subjects grouped during delivery?* |  | Procedures | |  | |
| *Deliverer: who delivered the intervention?* |  | Procedures | |  | |
| *Setting: where was the intervention delivered?* |  | Procedures | |  | |
| *Exposure quantity and duration: how many sessions were intended to be delivered? How long were they intended to last?* |  | Procedures | |  | |
| *Time span: how long was it intended to take to deliver the intervention to each unit?* |  | Procedures | |  | |
| *Activities to increase compliance or adherence (e.g., incentives)* |  | Procedures | |  | |
| Objectives | 5 | Specific objectives and hypotheses |  | Introduction | |  | |
| Outcomes | 6 | Clearly defined primary and secondary outcome measures |  | Procedures | |  | |
| Methods used to collect data and any methods used to enhance the quality of measurements |  | Procedures | |  | |
| Information on validated instruments such as psychometric and biometric properties |  | Procedures | |  | |
| Sample size | 7 | Explain how the study size was determined |  | Study design | |  | |
| Assignment method | 8 | Unit of assignment (the unit being assigned to study condition, e.g., individual, group, community) |  | Study design | |  | |
| Method used to assign units to study conditions, including details of any restriction (e.g., blocking, stratification, minimization) |  | Study design | |  | |
| Blinding | 9 | Whether or not participants, those administering the interventions, and those assessing the outcomes were blinded to study condition assignment; |  | Randomization and masking | |  | |
| Unit of analysis | 10 | Description of the smallest unit that is being analyzed to assess intervention effects (e.g., individual, group, or community) |  | Statistical analyses | |  | |
| If the unit of analysis differs from the unit of assignment, the analytical method used to account for this (e.g., adjusting the standard error estimates by the design effect or using multilevel analysis) |  | n/a | |  | |
| Statistical methods | 11 | Statistical methods used to compare study groups for primary methods outcome(s), including complex methods of correlated data |  | Statistical analyses | |  | |
| Statistical methods used for additional analyses, such as a subgroup analyses and adjusted analysis |  | Statistical analyses | |  | |
| Methods for imputing missing data, if used |  | Statistical analyses | |  | |
| Statistical software or programs used |  | Statistical analyses | |  | |
| Results | | |  |  |  | |  |
| Participant flow | 12 | Flow of participants through each stage of the study: enrollment, assignment, allocation, and intervention exposure, follow-up, analysis (a diagram is strongly recommended) |  | Results | |  | |
| Enrollment: the numbers of participants screened for eligibility, found to be eligible or not eligible, declined to be enrolled, and enrolled in the study |  | Results | |  | |
| Assignment: the numbers of participants assigned to a study condition |  | Results | |  | |
| Allocation and intervention exposure: the number of participants assigned to each study condition and the number of participants who received each intervention |  | Results | |  | |
| Follow-up: the number of participants who completed the follow-up or did not complete the follow-up (i.e., lost to follow-up), by study condition |  | Results | |  | |
| Analysis: the number of participants included in or excluded from the main analysis, by study condition |  | Results | |  | |
| Description of protocol deviations from study as planned, along with reasons |  | n/a | |  | |
| Recruitment | 13 | Dates defining the periods of recruitment and follow-up |  | Study design | |  | |
| Baseline data | 14 | Baseline demographic and clinical characteristics of participants in each study condition |  | Results | |  | |
| Baseline characteristics for each study condition relevant to specific disease prevention research |  | Results | |  | |
| Baseline comparisons of those lost to follow-up and those retained, overall and by study condition |  | Results | |  | |
| Comparison between study population at baseline and target population of interest |  | Discussion | |  | |
| Baseline equivalence | 15 | Data on study group equivalence at baseline and statistical methods used to control for baseline differences |  | Results | |  | |
| Numbers analyzed | 16 | Number of participants (denominator) included in each analysis for each study condition, particularly when the denominators change for different outcomes; statement of the results in absolute numbers when feasible |  | Table 2 | |  | |
| Indication of whether the analysis strategy was “intention to treat” or, if not, description of how non-compliers were treated in the analyses |  | n/a | |  | |
| Outcomes and estimation | 17 | For each primary and secondary outcome, a summary of results for each estimation study condition, and the estimated effect size and a confidence interval to indicate the precision |  | Results | |  | |
| Inclusion of null and negative findings |  | Results | |  | |
| Inclusion of results from testing pre-specified causal pathways through which the intervention was intended to operate, if any |  | n/a | |  | |
| Ancillary analyses | 18 | Summary of other analyses performed, including subgroup or restricted analyses, indicating which are pre-specified or exploratory |  | Results | |  | |
| Adverse events | 19 | Summary of all important adverse events or unintended effects in each study condition (including summary measures, effect size estimates, and confidence intervals) |  | Results | |  | |
| Discussion | | |  |  |  | |  |
| Interpretation | 20 | Interpretation of the results, taking into account study hypotheses, sources of potential bias, imprecision of measures, multiplicative analyses, and other limitations or weaknesses of the study |  | Discussion | |  | |
| Discussion of results taking into account the mechanism by which the intervention was intended to work (causal pathways) or alternative mechanisms or explanations |  | Discussion | |  | |
| Discussion of the success of and barriers to implementing the intervention, fidelity of implementation |  | Discussion | |  | |
| Discussion of research, programmatic, or policy implications |  | Discussion | |  | |
| Generalisability | 21 | Generalizability (external validity) of the trial findings, |  | Discussion | |  | |
| Overall evidence | 22 | General interpretation of the results in the context of current evidence and current theory |  | Discussion | |  | |
